# Supplementary material for: TauCstF-64 Mediates Correct mRNA Polyadenylation and Splicing of Activator and Repressor Isoforms of the Cyclic AMP-Responsive Element Modulator (CREM) in Mouse Testis
Source: PubMed Central journal article supplement — Biol Reprod. 2015 Dec 23;94(2):34. doi: 10.1095/biolreprod.115.134684 (PMC4787626; doi:10.1095/biolreprod.115.134684), 2015-12-23
Supplement: supp_115.134684_biolreprod.115.134684-1.pdf [file supp_115.134684_biolreprod.115.134684-1.pdf]

**Grozdanov et al. Supplemental Table S1. Primers used in this work.**

| Description                        | Primer name     | Primer sequence 5' to 3' |
|------------------------------------|-----------------|--------------------------|
| <b>Primer set A</b>                |                 |                          |
|                                    | Cremex3F        | TCACAGCAGGATCGAAGTGT     |
|                                    | Cremex5R        | TCTGTCTCTGCAATTGTTGCT    |
| <b>Primer Set B</b>                |                 |                          |
|                                    | Cremf2          | ATCGCATCACCTTACCCTGT     |
|                                    | Cremex5R        | TCTGTCTCTGCAATTGTTGCT    |
| <b>Primer set C</b>                |                 |                          |
|                                    | CREMV9ex3aF     | CCAGGACAGTGACTACCTCCT    |
|                                    | CREMV9ex7R      | AATTGTAGCACCTGGCGGAG     |
| <b>Real-time PCR primers</b>       |                 |                          |
| <i>Crem polyA use verification</i> |                 |                          |
|                                    | CremEx10commonF | TTGAGAGTCGAGTCGCAGTG     |
|                                    | CremEx10commonR | TCTGTTTTGGGAGAGCAAATGT   |
|                                    | CremEx10distalF | TCTGAGCATTACTACAGCTTCC   |
|                                    | CremEx10distalR | ACAGCAAAGCAGCACAAACTT    |
| <i>Gene expression</i>             |                 |                          |
|                                    | Kif17qF         | CGCTAGCAACTACTTCCGCT     |
|                                    | Kif17qR         | AATTTAGCCCCGGTGGTGAG     |
|                                    | Fhl5qF          | CCTGCACCAAACCCATCACT     |
|                                    | Fhl5qR          | TTCCGCAGTTGAAGCACTCA     |
|                                    | Gtf2a1qF        | AACTCGGCAAACACAAACACC    |
|                                    | Gtf2a1qR        | TCATCCACTCCGTCATCCAGA    |
|                                    | Tnp1F           | ATACCGGAAGAGCGTCCTGA     |
|                                    | Tnp1R           | CATTGCCGCATCACAAGTGG     |
|                                    | Tnp2F           | GAGCCTTCCCACCACTCAT      |
|                                    | Tnp2R           | TGCACTGGTTACTGGTGTGACT   |
|                                    | Prm1F           | GAAGATGTCGCAGACGGAGG     |
|                                    | Prm2R           | TTATGGTGTATGAGCGGCGG     |
|                                    | Etv2F           | CTGGAACCCCGCTTTACCTC     |
|                                    | Etv2R           | TCCCAGGTCTGTCCAGTCTC     |
|                                    | GlulF           | TTATGGGAACAGACGGCCAC     |
|                                    | GlulR           | GCTCCCACACCGCAGTAATA     |
|                                    | Pim1F           | CTCATCGACTTCGGGTCCG      |
|                                    | Pim1R           | GCGAATCCACTCTGGAGGAC     |
|                                    | Jund1F          | TCCCGCCCCTTTATGCAAAT     |
|                                    | Jund1R          | CACTCTTATAGCCTCGGCC      |
|                                    | Lypla1F         | CGCCGCGGTTATTTTCCTTC     |
|                                    | Lypla1R         | GTGGGGACTTTTGATACCTGC    |
|                                    | Cstf2F          | GGCCCTGGTTCCTTAGCCCCT    |
|                                    | Cstf2R          | GCAAGGCTCCCCGCTGCATA     |
|                                    | Cstf2tF         | CAACCGTGGCCCTGCCTCAC     |
|                                    | Cstf2tR         | GGCCGAGTCTCCATCCCTCG     |
|                                    | 18SrRNAF        | CGCCGCTAGAGGTGAAATTC     |
|                                    | 18SrRNAR        | TTGGCAAATGCTTTTCGCTC     |
